# Supplementary material
Source: PubMed Central journal article supplement (PMC4558705)
Supplement: supp_tpc.15.00122_TPC2015-00122-RAR1_Supplemental_Data.pdf [file supp_tpc.15.00122_TPC2015-00122-RAR1_Supplemental_Data.pdf]

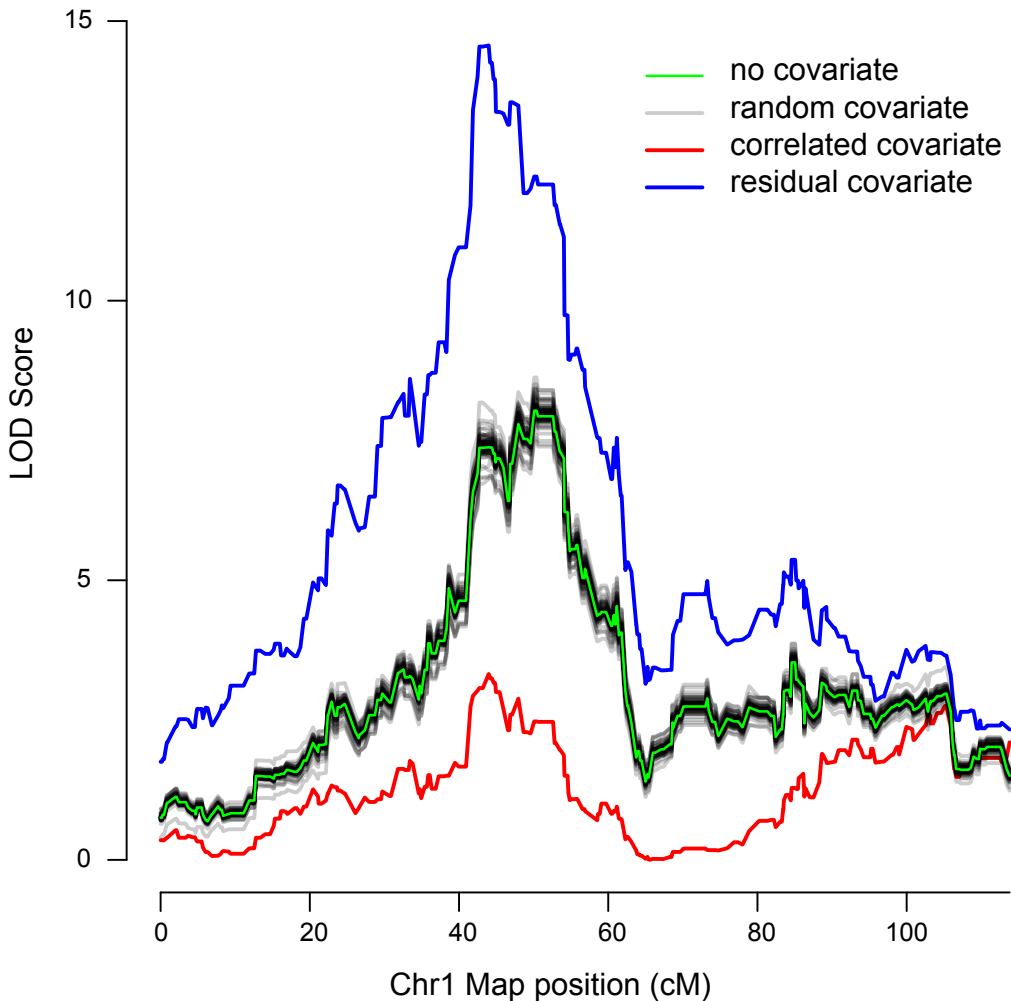

**Supplemental Figure 1.** Visualization of the concept of the covariate scan approach. A phenotype was simulated within a simulated map so that a QTL with an effect size of 1 would be found at 45cM on Chr 1. A one-QTL scan was performed using no covariates (green line) and several simulated covariates. The covariates were generated so that the normal distribution, sample size, mean and standard deviation of the simulated phenotype data were maintained. The random covariates (grey lines) were 100 sets of permuted vectors of the simulated phenotype data. A correlated covariate (red line) value was generated for each RIL by making a draw from a distribution around the RIL phenotype value with a standard deviation of the entire RIL population. The residual covariate (blue line) was generated in an identical manner to the correlated covariate, except that the RIL phenotypic value was replaced with its residual from the original QTL model.

**A** correlation of phenotypes with QTL near 4@4

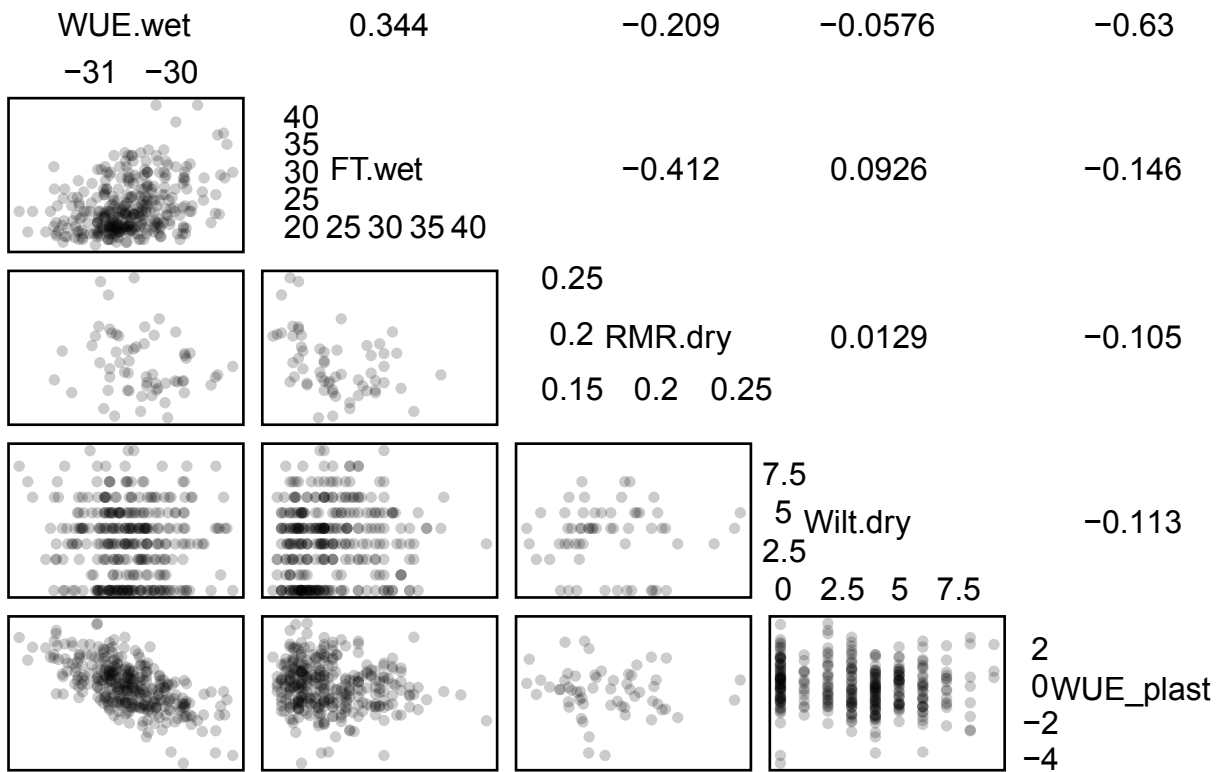

**B** correlation of phenotypes with QTL near 2@74

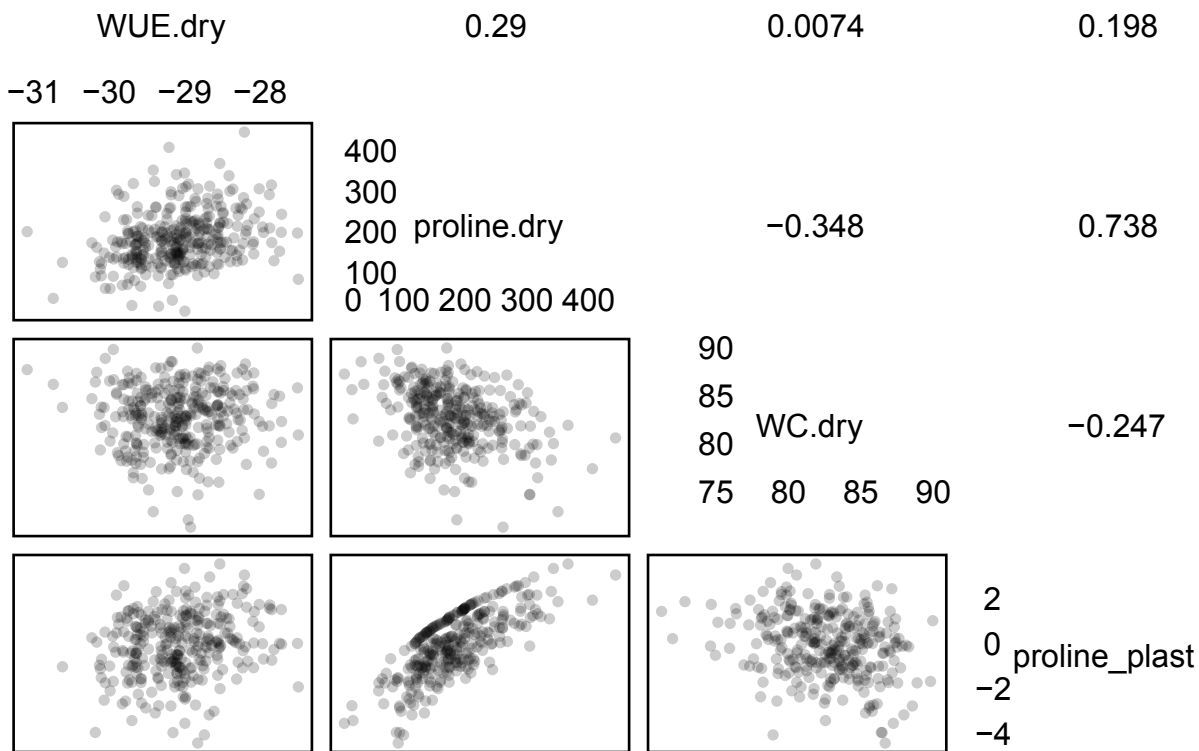

**Supplemental Figure 2.** Correlation of phenotypes with colocalized QTL on proximate Chr4 (A) and distal Chr2 (B). Pearson's correlation coefficients (r) are printed in the upper diagonal of each matrix.

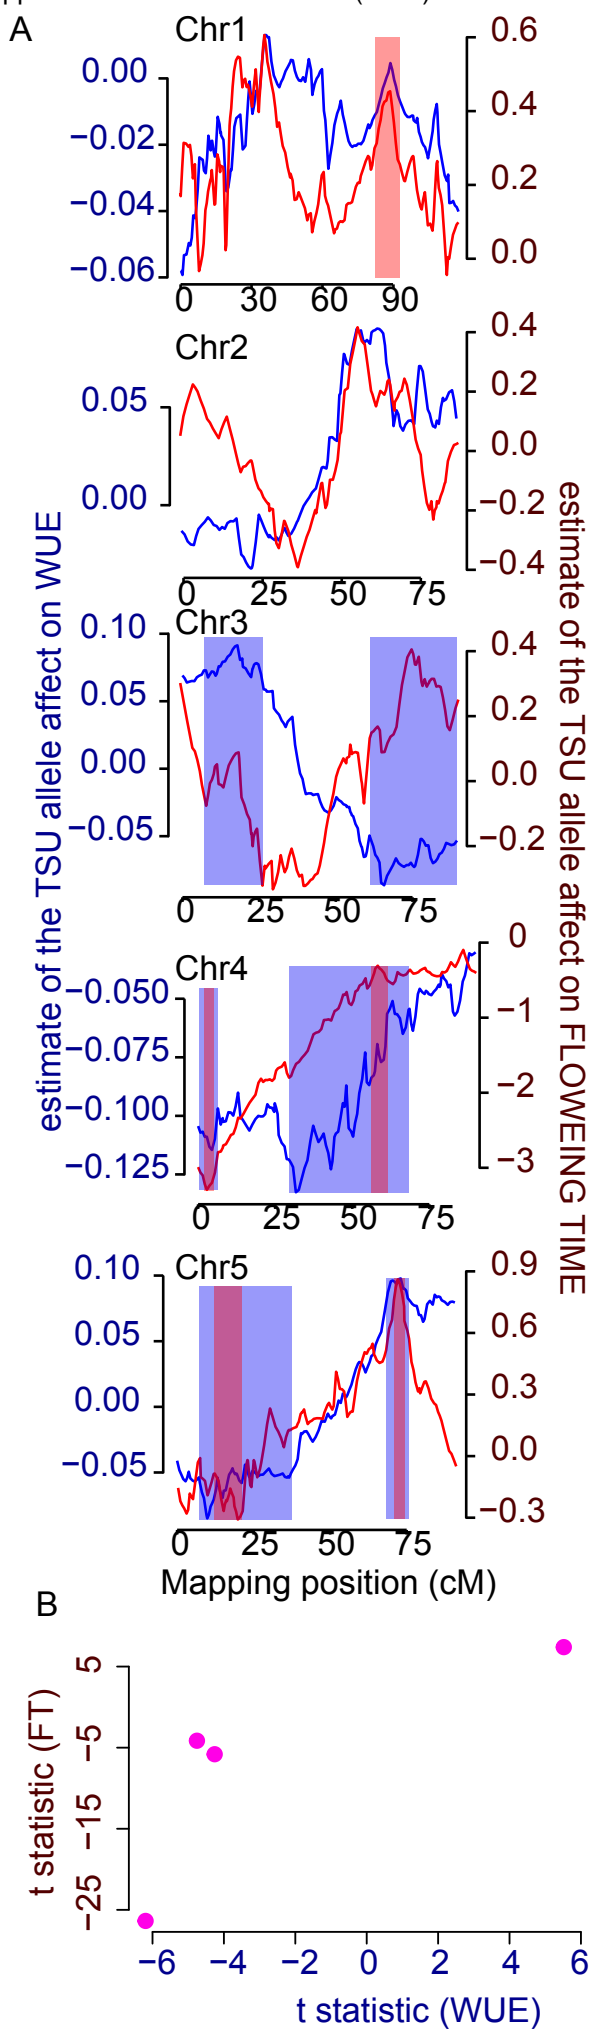

**Supplemental Figure 3.** Effect of allelic variation on the correlation between WUE and FT. Allelic effects at each marker for WUE (blue) and FT (red) are plotted as solid lines and are standardized by the maximum values for each trait and chromosome (A). The QTL confidence intervals are shaded with the respective colors. The four pleiotropic QTLs (for both WUE and FT) promoted a positive correlation between WUE and FT (B).

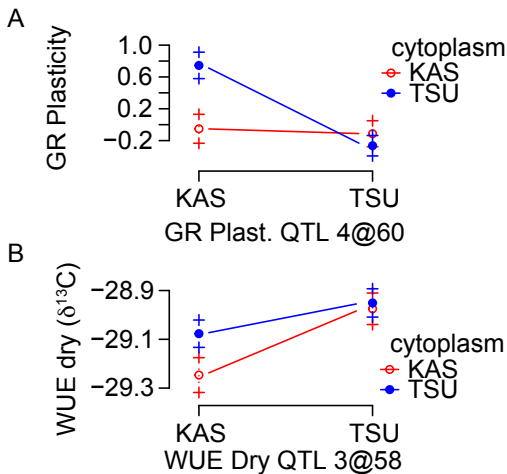

**Supplemental Figure 4.** Cytoplasmic interactions with genomic QTLs. Data are presented for two significant QTLs for growth rate plasticity (A) and WUE in the dry environment (B). Allelic means  $\pm$  SE are reported.

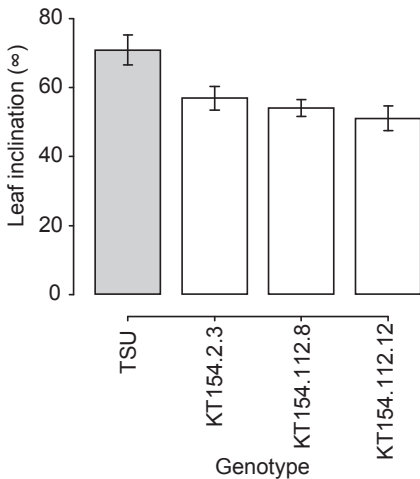

**Supplemental Figure 5.** Validation of the allelic effect of *CSA1* using NILs. Leaf inclination of four genotypes- the NILs have KAS alleles at FT QTL 5@15, but TSU alleles elsewhere. Leaf inclination was measured in ImageJ. Means +/- SE are reported.

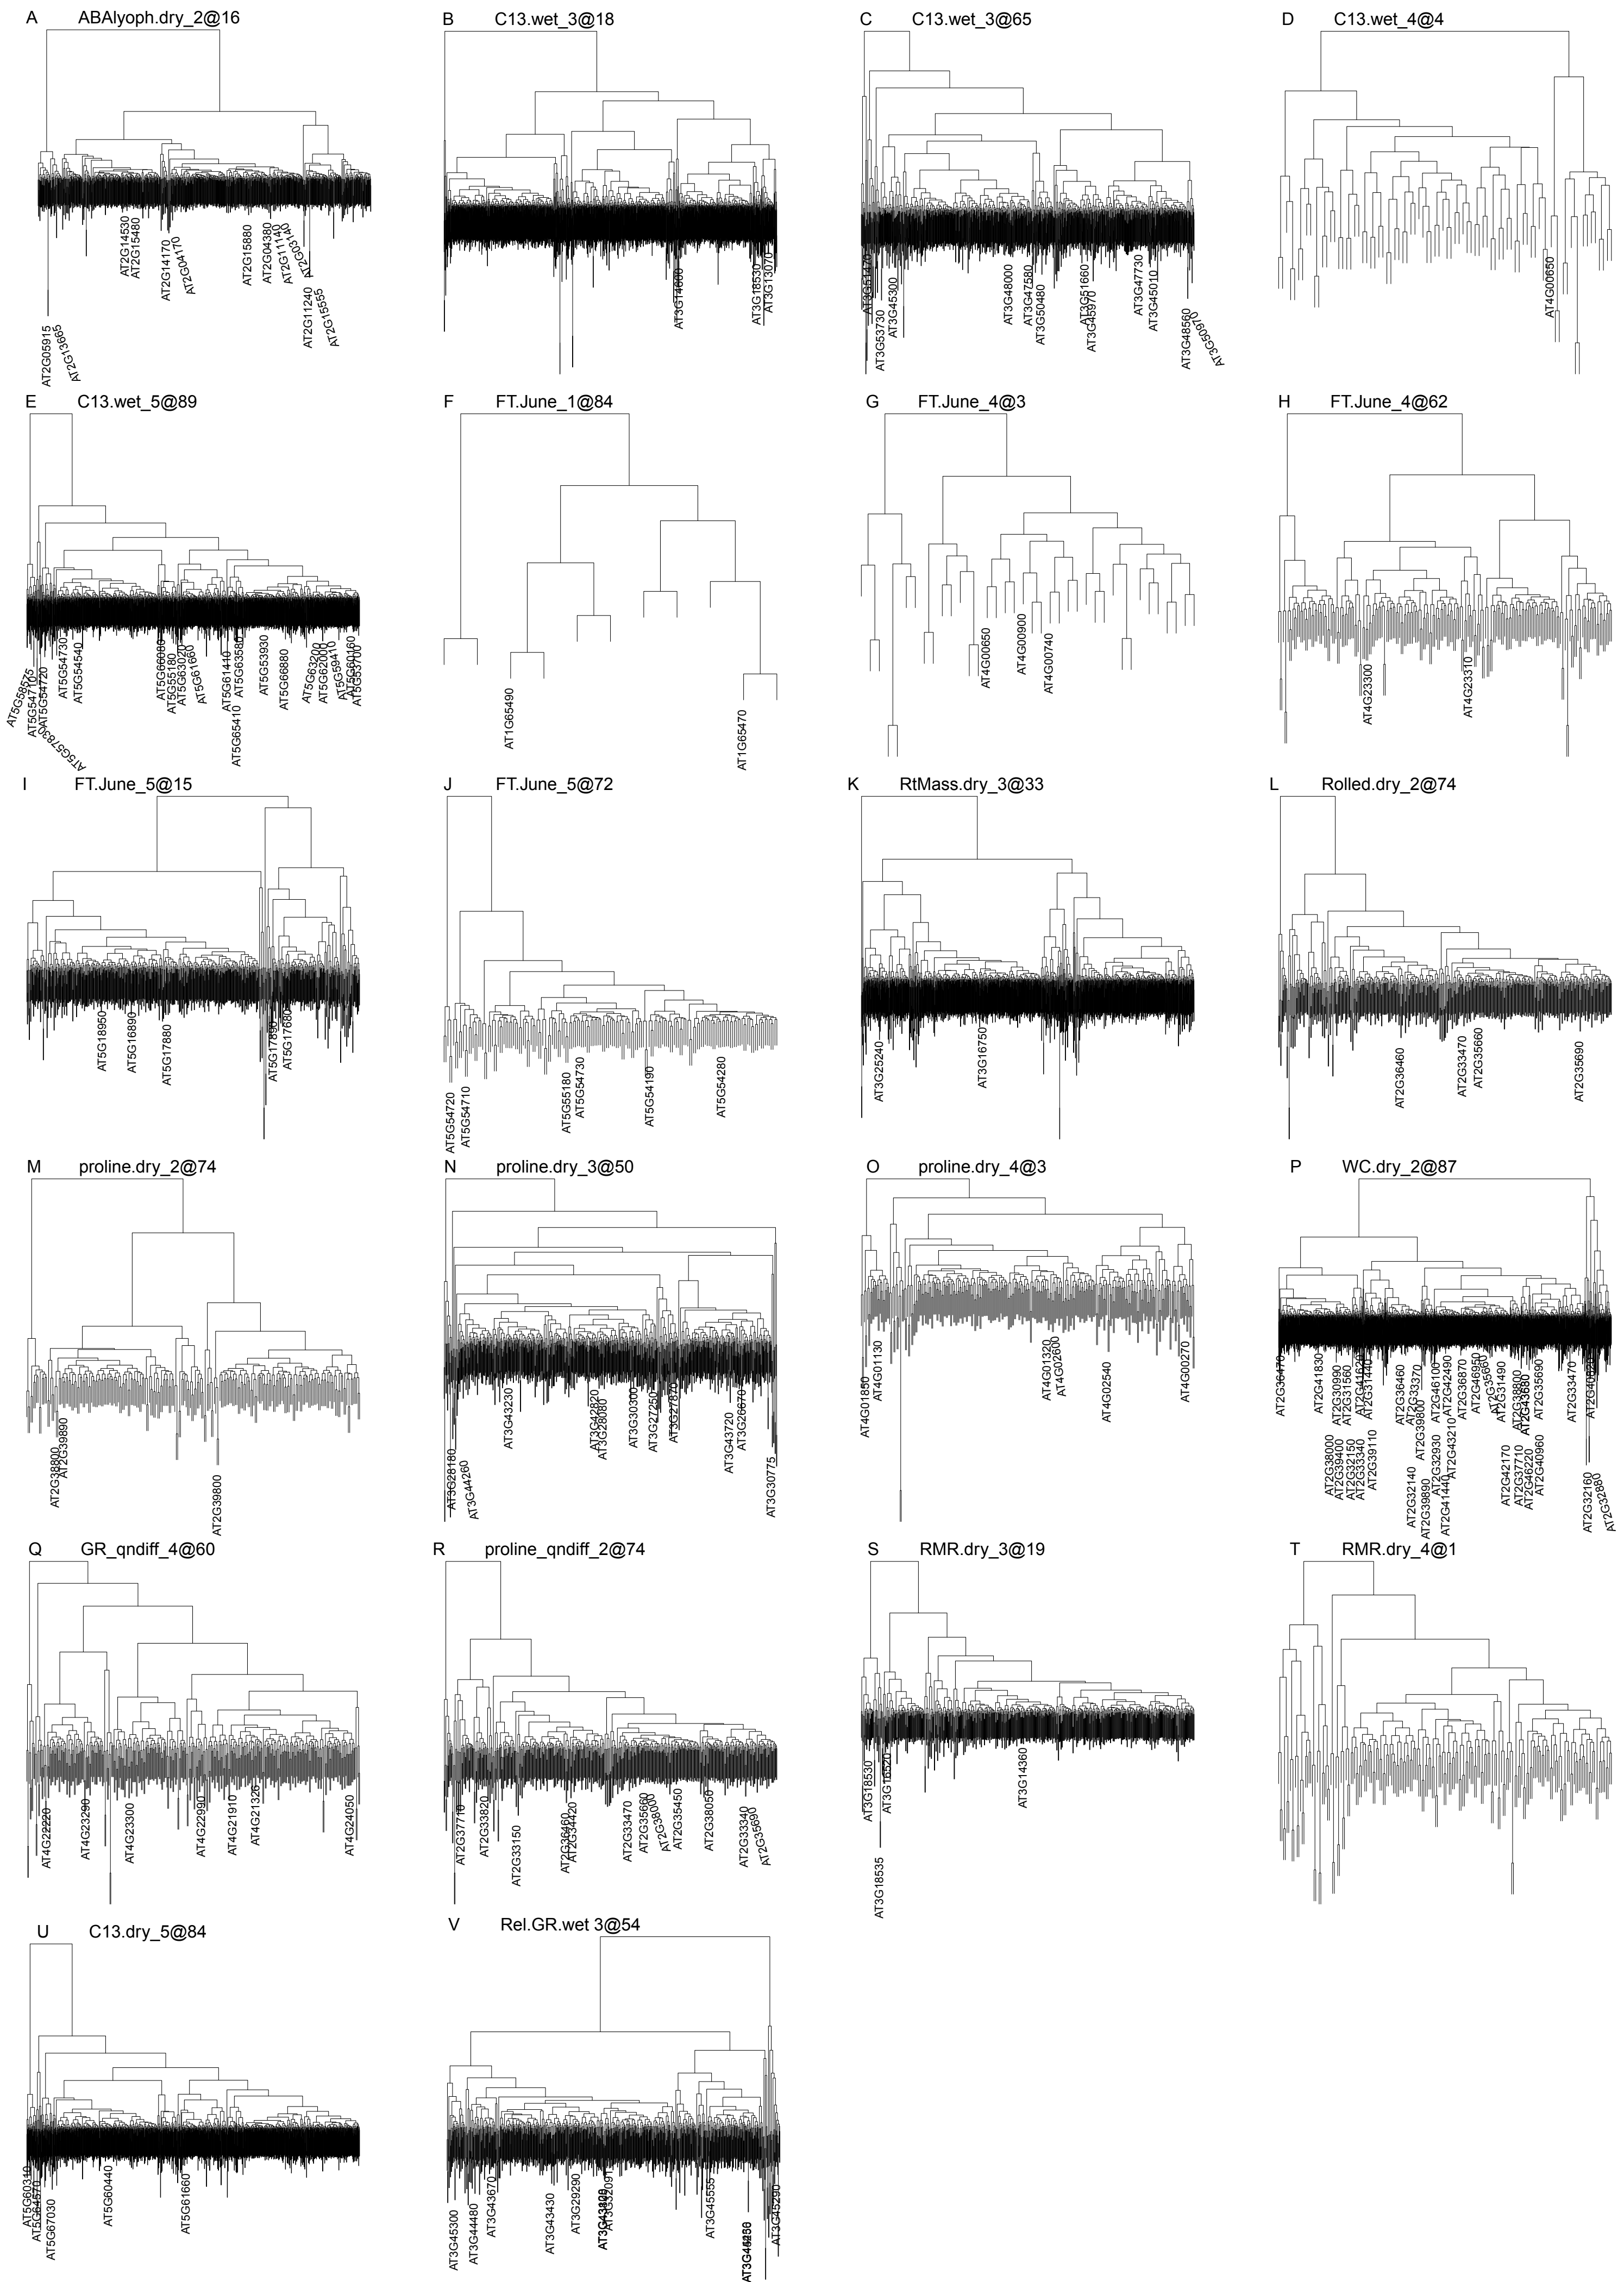

**Supplemental Figure 6.** Hierarchical clustering of the covariance of all genes within each narrow QTL interval. Tip labels indicate the names of significant candidate genes. Empty tips signify genes that were not significant candidates. Gene labels that overlapped are distinguished by the positioning of the right-most overlapping gene at an angle to the left label.

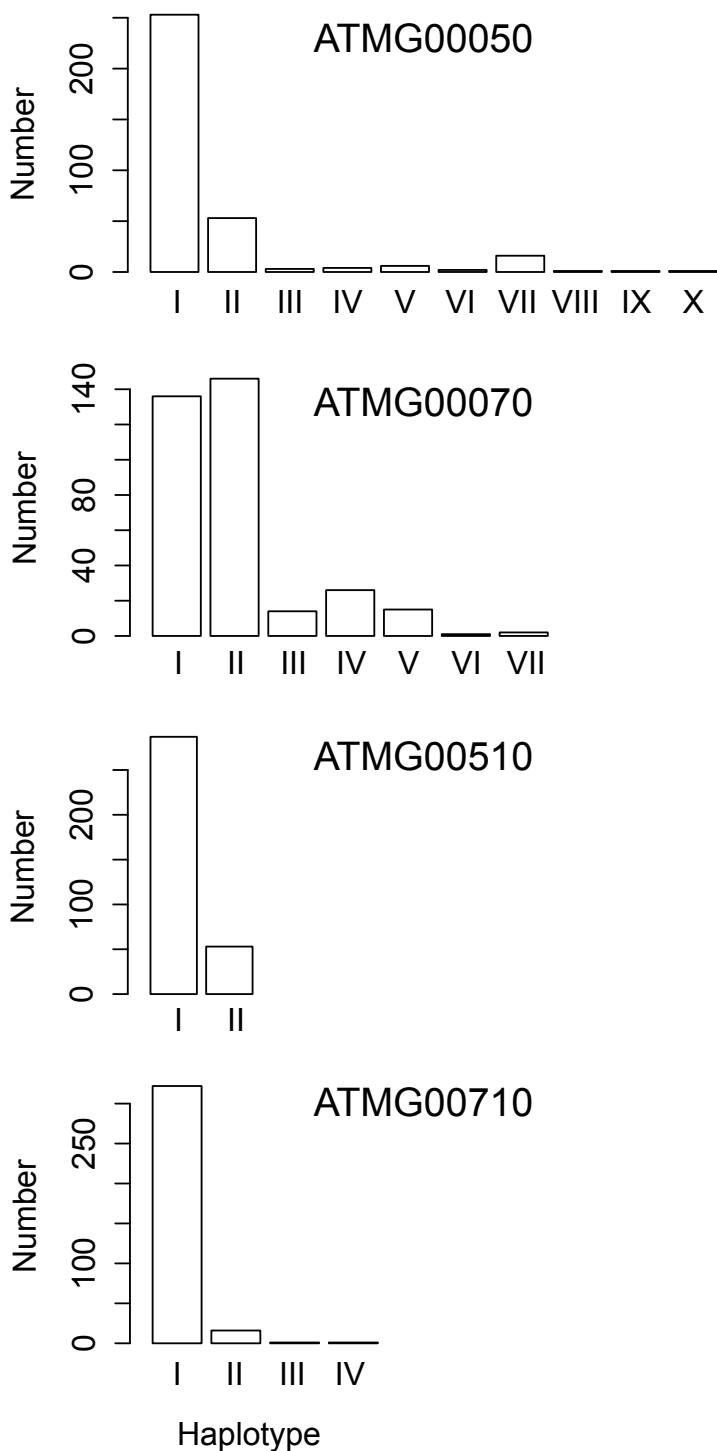

**Supplemental Figure 7.** Haplotype diversity of the four genes that contained SNPs in the mitochondrial genome. The total membership of each haplotype is represented by vertical bars,  $n = 340$ . The 340 mitochondrial gene sequences for each of the four genes were downloaded from the 1001 genomes project.

Supplemental Data. Lovell et al. (2015). Plant Cell 10.1105/tpc.15.00122

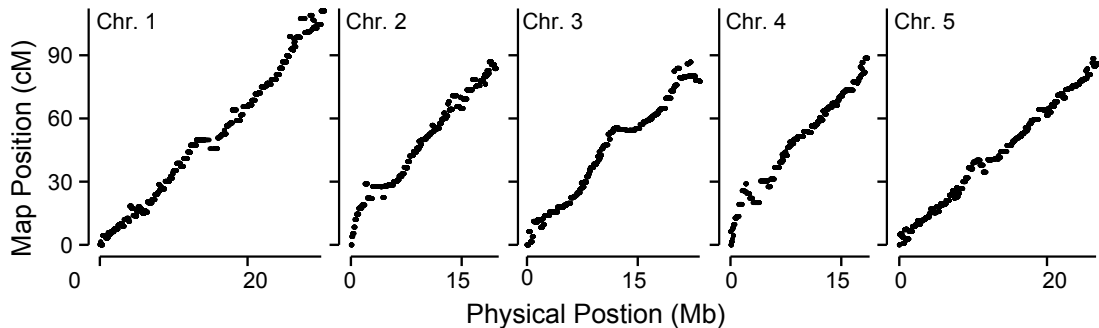

**Supplemental Figure 8.** Comparison of the physical position (bp) for all TAIR10 gene models with the mapping position in cM.



## Supplemental Data. Lovell et al. (2015). Plant Cell 10.1105/tpc.15.00122

**Supplemental Table 1.** Phenotypic correlations between plasticity and mean breeding values for all measured phenotypic traits. Correlation coefficients are reported; \* indicates significant correlations at  $\alpha = 0.05$ .

|         | LA    | SFM   | SDM   | RDM    | RMR    | WUE    | proline | SR    | GR    | WC    |
|---------|-------|-------|-------|--------|--------|--------|---------|-------|-------|-------|
| LA      |       |       |       |        |        |        |         |       |       |       |
| SFM     | 0.89* |       |       |        |        |        |         |       |       |       |
| SDM     | 0.77* | 0.84* |       |        |        |        |         |       |       |       |
| RDM     | 0.65* | 0.69* | 0.60* |        |        |        |         |       |       |       |
| RMR     | -0.03 | -0.08 | -0.06 | 0.35*  |        |        |         |       |       |       |
| WUE     | -0.02 | 0     | -0.02 | 0.09   | 0.07   |        |         |       |       |       |
| proline | 0.12* | 0.1   | 0.06  | 0.11   | 0.06   | -0.21* |         |       |       |       |
| SR      | -0.01 | 0.02  | 0.14  | -0.31* | -0.73* | -0.1   | 0.04    |       |       |       |
| GR      | 0.51* | 0.41* | 0.29* | 0.16   | -0.25  | 0.03   | 0.12*   | 0.2   |       |       |
| WC      | 0.21* | 0.20* | -0.09 | -0.03  | 0.14   | -0.01  | 0.33*   | 0     | 0.25* |       |
| ABA     | 0.04  | 0     | 0.02  | 0.05   | 0.14   | -0.02  | 0.02    | -0.05 | -0.02 | -0.01 |

**Supplemental Table 2**. Summary statistics for all terms in each QTL models. ANOVA statistics (LOD, % variance explained, F-statistic and P-value of the F statistic) are derived by calculating the difference between a full ANOVA model and one where terms are iteratively removed. Effect estimates (Effect) are calculated through a t-test of the effect of alleles at the QTL position on the respective phenotype. The associated standard error and t statistic are reported.

| Phenotype | Treatment | Chr.      | Pos. (cM) | LOD   | % Var | F      | P-value | Effect   | SE     | t-statistic |
|-----------|-----------|-----------|-----------|-------|-------|--------|---------|----------|--------|-------------|
| LA        | dry       | 1         | 31.651    | 2.7   | 3.49  | 12.55  | 0.0005  | -0.6144  | 0.1734 | -3.5433     |
| LA        | dry       | 3         | 89.501    | 2.56  | 3.3   | 11.89  | 0.0006  | 0.5843   | 0.1694 | 3.4486      |
| RMR       | dry       | 3         | 18.982    | 3.58  | 19.79 | 18     | 0.0001  | 0.0122   | 0.0029 | 4.2424      |
| RMR       | dry       | 4         | 1.473     | 2.96  | 15.98 | 14.53  | 0.0003  | 0.011    | 0.0029 | 3.8115      |
| RGR       | dry       | 1         | 12.321    | 2.4   | 3.31  | 11.15  | 0.0009  | -0.0098  | 0.0029 | -3.3399     |
| RGR       | dry       | 3         | 29.815    | 2.77  | 3.81  | 12.87  | 0.0004  | -0.0102  | 0.0028 | -3.5875     |
| Wilt      | dry       | 4         | 2.132     | 2.85  | 4.01  | 70.95  | 0.0003  | -0.4779  | 0.1309 | -3.651      |
| WUE       | dry       | 2         | 74.357    | 2.81  | 3.6   | 13.02  | 0.0004  | 0.117    | 0.0324 | 3.6079      |
| WUE       | dry       | 3         | 58.473    | 2.93  | 3.77  | 13.61  | 0.0003  | -0.115   | 0.0312 | -3.6888     |
| WUE       | dry       | 5         | 84.177    | 2.75  | 3.53  | 12.77  | 0.0004  | 0.113    | 0.0316 | 3.5728      |
| ABA       | dry       | 2         | 15.5013   | 3.64  | 5.16  | 270.04 | <0.0001 | -0.9857  | 0.2385 | -4.1333     |
| RGR       | wet       | cytoplasm |           | 0.06  | 0.08  | 0.28   | 0.5938  | -0.0029  | 0.0055 | -0.5339     |
| RGR       | wet       | 3         | 53.591    | 4.77  | 6.7   | 22.54  | <0.0001 | -0.0132  | 0.0028 | -4.7481     |
| WUE       | wet       | cytoplasm |           | 2.36  | 2.35  | 10.78  | 0.0011  | -0.1427  | 0.0435 | -3.2826     |
| WUE       | wet       | 3         | 17.916    | 3.12  | 3.13  | 14.33  | 0.0002  | 0.0866   | 0.0229 | 3.785       |
| WUE       | wet       | 3         | 64.783    | 5.06  | 5.15  | 23.57  | <0.0001 | -0.1147  | 0.0236 | -4.8549     |
| WUE       | wet       | 4         | 4.408     | 6.89  | 7.1   | 32.49  | <0.0001 | -0.1281  | 0.0225 | -5.7001     |
| WUE       | wet       | 4         | 42.395    | 2.59  | 2.59  | 11.87  | 0.0006  | -0.0777  | 0.0225 | -3.4453     |
| WUE       | wet       | 5         | 37.2105   | 3.47  | 3.49  | 15.98  | 0.0001  | -0.0923  | 0.0231 | -3.9976     |
| WUE       | wet       | 5         | 89.2057   | 6.18  | 6.33  | 29     | <0.0001 | 0.1261   | 0.0234 | 5.385       |
| FT        | wet       | cytoplasm |           | 0.26  | 0.12  | 1.15   | 0.2837  | 0.3242   | 0.3019 | 1.0737      |
| FT        | wet       | 1         | 83.846    | 7.9   | 3.95  | 37.48  | <0.0001 | 0.9542   | 0.1559 | 6.122       |
| FT        | wet       | 4         | 2.791     | 72.94 | 59.12 | 280.3  | <0.0001 | -3.6757  | 0.1553 | -23.6752    |
| FT        | wet       | 4         | 62.073    | 10.21 | 5.19  | 24.62  | <0.0001 | -0.8558  | 0.1553 | -5.51       |
| FT        | wet       | 5         | 15.25     | 3.78  | 1.84  | 17.42  | <0.0001 | -0.6427  | 0.154  | -4.1743     |
| FT        | wet       | 5         | 71.677    | 8.44  | 4.24  | 40.22  | <0.0001 | 0.9833   | 0.1551 | 6.3416      |
| FT        | wet       | 4*4       | 2.8*62.1  | 4.85  | 2.38  | 22.54  | <0.0001 | 0.747    | 0.1573 | 4.748       |
| RDM       | dry       | cytoplasm |           | 0     | 0.01  | 0.01   | 0.9197  | -0.0001  | 0.0008 | -0.1013     |
| RDM       | dry       | 3         | 32.992    | 2.83  | 19.23 | 13.81  | 0.0005  | 0.0014   | 0.0004 | 3.7161      |
| GR        | dry       | cytoplasm |           | 0.01  | 0.02  | 0.05   | 0.8235  | -0.073   | 0.3272 | -0.2233     |
| GR        | dry       | 3         | 3.905     | 3.23  | 4.57  | 15.08  | 0.0001  | -0.6342  | 0.1633 | -3.8833     |
| roll      | dry       | cytoplasm |           | 3.45  | 4.55  | 16.11  | 0.0001  | -0.9839  | 0.2451 | -4.0141     |
| roll      | dry       | 2         | 73.572    | 4.68  | 6.24  | 22.08  | <0.0001 | -0.5878  | 0.1251 | -4.6992     |
| proline   | dry       | cytoplasm |           | 11.68 | 10.63 | 57.41  | <0.0001 | 42.8159  | 5.6506 | 7.5773      |
| proline   | dry       | 2         | 74.357    | 24.81 | 24.9  | 67.25  | <0.0001 | 34.0946  | 3.0141 | 11.3118     |
| proline   | dry       | 3         | 50.173    | 5.64  | 4.91  | 13.27  | <0.0001 | -10.5931 | 2.8986 | -3.6546     |
| proline   | dry       | 4         | 2.791     | 4.02  | 3.46  | 18.72  | <0.0001 | -12.1285 | 2.8036 | -4.3261     |
| proline   | dry       | 2*3       | 74.4*50.2 | 2.68  | 2.29  | 12.35  | 0.0005  | -10.8614 | 3.0909 | -3.514      |
| WC        | dry       | cytoplasm |           | 3.06  | 4.07  | 14.25  | 0.0002  | -1.279   | 0.3388 | -3.7755     |
| WC        | dry       | 2         | 86.92     | 2.53  | 3.35  | 11.73  | 0.0007  | -0.6043  | 0.1764 | -3.4254     |
| LA        | plast     | cytoplasm |           | 1.48  | 1.88  | 6.82   | 0.0094  | -0.3405  | 0.1303 | -2.6121     |
| LA        | plast     | 1         | 3.304     | 2.46  | 3.14  | 11.38  | 0.0008  | -0.2239  | 0.0664 | -3.3732     |
| LA        | plast     | 3         | 27.474    | 3.26  | 4.18  | 15.18  | 0.0001  | -0.2573  | 0.0661 | -3.8956     |
| GR        | plast     | cytoplasm |           | 0.43  | 0.61  | 1.97   | 0.1615  | 0.2197   | 0.1565 | 1.4035      |
| GR        | plast     | 3         | 3.905     | 3.06  | 4.39  | 14.26  | 0.0002  | -0.2944  | 0.078  | -3.7756     |
| GR        | plast     | 4         | 59.798    | 3.36  | 4.83  | 15.68  | 0.0001  | -0.3221  | 0.0813 | -3.96       |
| WUE       | plast     | cytoplasm |           | 1.9   | 2.6   | 8.81   | 0.0032  | 0.4016   | 0.1353 | 2.9674      |
| WUE       | plast     | 4         | 4.408     | 2.53  | 3.47  | 11.77  | 0.0007  | 0.2336   | 0.0681 | 3.4309      |
| proline   | plast     | cytoplasm |           | 1.79  | 2.29  | 8.26   | 0.0043  | 0.4286   | 0.1491 | 2.8744      |
| proline   | plast     | 2         | 73.572    | 10.01 | 13.66 | 49.25  | <0.0001 | 0.5289   | 0.0754 | 7.0179      |

**Supplemental Table 3.** T statistics for the additive effect of cytoplasm. Significance is measured by a Bonferroni threshold.

| phenotype   | <i>t</i> | <i>df</i> | <i>P</i> | significance |
|-------------|----------|-----------|----------|--------------|
| LA.wet      | -1.4     | 327.17    | 1.64E-01 |              |
| LA.dry      | 1.65     | 314.44    | 9.94E-02 |              |
| SFM.wet     | -1.47    | 313.36    | 1.41E-01 |              |
| SFM.dry     | 1.49     | 307.21    | 1.37E-01 |              |
| SDM.wet     | -2.2     | 324.58    | 2.88E-02 |              |
| SDM.dry     | -2.03    | 310.15    | 4.36E-02 |              |
| RDM.wet     | -2.06    | 27.69     | 4.88E-02 |              |
| RDM.dry     | 0.03     | 31.91     | 9.78E-01 |              |
| RMR.wet     | 1.03     | 36.91     | 3.08E-01 |              |
| RMR.dry     | 2.17     | 45.03     | 3.55E-02 |              |
| SR.wet      | -0.6     | 15.61     | 5.57E-01 |              |
| SR.dry      | -2.22    | 14.03     | 4.38E-02 |              |
| GR.wet      | 2.2      | 277.71    | 2.85E-02 |              |
| GR.dry      | 0.08     | 268.85    | 9.36E-01 |              |
| RGR.wet     | 0.11     | 297.42    | 9.14E-01 |              |
| RGR.dry     | -0.38    | 281.68    | 7.03E-01 |              |
| Wilt.dry    | 0.03     | 305.15    | 9.79E-01 |              |
| Roll.dry    | 3.58     | 282.09    | 4.10E-04 | **           |
| WUE.wet     | 3.23     | 308.45    | 1.39E-03 | **           |
| WUE.dry     | -1.26    | 267.93    | 2.08E-01 |              |
| ABA.wet     | -4.74    | 305.91    | 3.32E-06 | **           |
| ABA.dry     | -6.85    | 290.67    | 4.29E-11 | **           |
| proline.wet | -0.12    | 201.55    | 9.05E-01 |              |
| proline.dry | -5.59    | 302.63    | 5.04E-08 | **           |
| FT.wet      | -0.77    | 313.88    | 4.45E-01 |              |
| WC.dry      | 3.44     | 287.6     | 6.60E-04 | **           |
| WC.wet      | 0.75     | 315.75    | 4.57E-01 |              |

**Supplemental Table 4.** Significance of cytoplasm epistasis on each QTL. Statistics were derived from iterative post-hoc ANOVAs comparing a complete model to one without the cytoplasm epistas

| <b>QTL Interact phenotype</b> | <b>Type.III.SS</b> | <b>LOD</b> | <b>%var</b> | <b>F.value</b> | <b>Pvalue.Chi2.</b> |
|-------------------------------|--------------------|------------|-------------|----------------|---------------------|
| 3@53.6:cyto\$ RGR.wet         | 0                  | 0.05       | 0.06        | 0.21           | 0.64                |
| 3@17.9:cyto\$ WUE.wet         | 0.03               | 0.04       | 0.04        | 0.18           | 0.67                |
| 3@64.8:cyto\$ WUE.wet         | 0.16               | 0.24       | 0.23        | 1.07           | 0.29                |
| 4@4.4:cyto\$c WUE.wet         | 0.21               | 0.31       | 0.31        | 1.41           | 0.23                |
| 4@42.4:cyto\$ WUE.wet         | 0.01               | 0.01       | 0.01        | 0.06           | 0.81                |
| 5@37.2:cyto\$ WUE.wet         | 0                  | 0          | 0           | 0              | 0.97                |
| 5@89.2:cyto\$ WUE.wet         | 0.08               | 0.12       | 0.12        | 0.54           | 0.46                |
| 1@83.8:cyto\$ FT.wet          | 2.73               | 0.08       | 0.04        | 0.36           | 0.54                |
| 4@2.8:cyto\$c FT.wet          | 8.25               | 0.25       | 0.12        | 1.1            | 0.29                |
| 4@62.1:cyto\$ FT.wet          | 18.04              | 0.54       | 0.25        | 2.43           | 0.12                |
| 5@15.2:cyto\$ FT.wet          | 3.02               | 0.09       | 0.04        | 0.4            | 0.52                |
| 5@71.7:cyto\$ FT.wet          | 8.2                | 0.24       | 0.12        | 1.1            | 0.29                |
| 1@31.7:cyto\$ LA.dry          | 6.73               | 0.16       | 0.2         | 0.74           | 0.39                |
| 3@89.5:cyto\$ LA.dry          | 10.6               | 0.26       | 0.32        | 1.16           | 0.28                |
| 3@33.0:cyto\$ RDM.dry         | 0                  | 0.07       | 0.45        | 0.32           | 0.56                |
| 3@19.0:cyto\$ RMR.dry         | 0                  | 0.01       | 0.03        | 0.02           | 0.88                |
| 4@1.5:cyto\$c RMR.dry         | 0                  | 0.71       | 3.3         | 3.08           | 0.07                |
| 3@3.9:cyto\$c GR.dry          | 7.1                | 0.19       | 0.26        | 0.86           | 0.35                |
| 1@12.3:cyto\$ RGR.dry         | 0                  | 0.16       | 0.22        | 0.75           | 0.38                |
| 3@29.8:cyto\$ RGR.dry         | 0                  | 0.08       | 0.1         | 0.35           | 0.55                |
| 4@2.1:cyto\$c Wilt.dry        | 0.54               | 0.02       | 0.03        | 0.1            | 0.75                |
| 2@73.6:cyto\$ Roll.dry        | 0.12               | 0.01       | 0.01        | 0.03           | 0.87                |
| 2@74.4:cyto\$ WUE.dry         | 1.13               | 0.87       | 1.09        | 3.97           | 0.04*               |
| 3@58.5:cyto\$ WUE.dry         | 0.36               | 0.28       | 0.35        | 1.27           | 0.26                |
| 5@84.2:cyto\$ WUE.dry         | 0.02               | 0.01       | 0.01        | 0.05           | 0.82                |
| 2@15.5:cyto\$ ABA.dry         | 62.79              | 0.98       | 1.2         | 4.47           | 0.03*               |
| 2@74.4:cyto\$ proline.dry     | 5904.98            | 0.54       | 0.45        | 2.42           | 0.12                |
| 3@50.2:cyto\$ proline.dry     | 233.73             | 0.02       | 0.02        | 0.1            | 0.76                |
| 4@2.8:cyto\$c proline.dry     | 674.45             | 0.06       | 0.05        | 0.28           | 0.6                 |
| 2@86.9:cyto\$ WC.dry          | 19.72              | 0.47       | 0.61        | 2.15           | 0.14                |
| 1@3.3:cyto\$c LA.plast        | 0.63               | 0.1        | 0.13        | 0.46           | 0.49                |
| 3@27.5:cyto\$ LA.plast        | 0.65               | 0.1        | 0.13        | 0.48           | 0.49                |
| 3@3.9:cyto\$c GR.plast        | 0.34               | 0.04       | 0.06        | 0.19           | 0.66                |
| 4@59.8:cyto\$ GR.plast        | 12.41              | 1.58       | 2.18        | 7.23           | <0.01*              |
| 4@4.4:cyto\$c WUE.plast       | 0.08               | 0.01       | 0.02        | 0.06           | 0.81                |
| 2@73.6:cyto\$ proline.plast   | 1.03               | 0.14       | 0.17        | 0.63           | 0.43                |















|           |              |         |   |                   |     |     |          |              |               |             |             |    |
|-----------|--------------|---------|---|-------------------|-----|-----|----------|--------------|---------------|-------------|-------------|----|
| AT3G23600 | RDM.dry_3_33 | RDM.dry | 3 | 32.992 C3_8206469 | dry | YES | 0.9586   | -1.705797659 | 1             | 0.002795359 | 0           | 0  |
| AT3G15180 | RDM.dry_3_33 | RDM.dry | 3 | 32.992 C3_8206469 | dry | YES | 0.9623   | -1.91384703  | 1             | 0           | 0           | 0  |
| AT3G18540 | RDM.dry_3_33 | RDM.dry | 3 | 32.992 C3_8206469 | dry | YES | 0.9659   | -1.994829098 | 1             | 0.009913259 | 0.026119403 | 0  |
| AT3G16400 | RDM.dry_3_33 | RDM.dry | 3 | 32.992 C3_8206469 | dry | YES | 0.9791   | -2.477153748 | 1             | 0.006369427 | 0.006382979 | 0  |
| AT3G18830 | RDM.dry_3_33 | RDM.dry | 3 | 32.992 C3_8206469 | dry | YES | 0.9787   | -2.540293764 | 1             | 0.014197531 | 0.001855288 | 0  |
| AT3G18535 | RDM.dry_3_33 | RDM.dry | 3 | 32.992 C3_8206469 | dry | YES | 0.9847   | -2.975762663 | 1 NA          | NA          | NA          | NA |
| AT3G16770 | RDM.dry_3_33 | RDM.dry | 3 | 32.992 C3_8206469 | dry | YES | 0.9908   | -3.616791051 | 1             | 0.033467202 | 0.036290323 | 0  |
| AT3G25470 | RDM.dry_3_33 | RDM.dry | 3 | 32.992 C3_8206469 | dry | YES | 0.9996   | -11.63941622 | 1             | 0.007726269 | 0.003322259 | 0  |
| AT2G33340 | WC.dry_2_87  | WC.dry  | 2 | 86.92 2-18752604  | dry | YES | 0        | 0.999560187  | 0             | 0.001319585 | 0.003966618 | 0  |
| AT2G43530 | WC.dry_2_87  | WC.dry  | 2 | 86.92 2-18752604  | dry | YES | 0        | 0.983653322  | 0             | 0.019379845 | 0.023529412 | 0  |
| AT2G43210 | WC.dry_2_87  | WC.dry  | 2 | 86.92 2-18752604  | dry | YES | 0        | 0.948187435  | 0             | 0.001253133 | 0.001883239 | 0  |
| AT2G46220 | WC.dry_2_87  | WC.dry  | 2 | 86.92 2-18752604  | dry | YES | 0        | 0.941620866  | 0             | 0.00137741  | 0.004149378 | 0  |
| AT2G43680 | WC.dry_2_87  | WC.dry  | 2 | 86.92 2-18752604  | dry | YES | 0        | 0.852994539  | 0             | 0.001493653 | 0.004487661 | 0  |
| AT2G46100 | WC.dry_2_87  | WC.dry  | 2 | 86.92 2-18752604  | dry | YES | 0        | 0.841243532  | 0             | 0           | 0           | 0  |
| AT2G38800 | WC.dry_2_87  | WC.dry  | 2 | 86.92 2-18752604  | dry | YES | 0        | 0.815860209  | 0             | 0.002175095 | 0.004901961 | 0  |
| AT2G32150 | WC.dry_2_87  | WC.dry  | 2 | 86.92 2-18752604  | dry | YES | 0        | 0.807382898  | 0             | 0.007575758 | 0.003802281 | 0  |
| AT2G42490 | WC.dry_2_87  | WC.dry  | 2 | 86.92 2-18752604  | dry | YES | 0        | 0.751402301  | 0             | 0.002145002 | 0.00128866  | 0  |
| AT2G32160 | WC.dry_2_87  | WC.dry  | 2 | 86.92 2-18752604  | dry | YES | 1.00E-04 | 0.732812577  | 0.001328571   | 0.010034589 | 0.020389912 | 0  |
| AT2G35690 | WC.dry_2_87  | WC.dry  | 2 | 86.92 2-18752604  | dry | YES | 0        | 0.691399333  | 0             | 0.002145002 | 0.00128866  | 0  |
| AT2G35660 | WC.dry_2_87  | WC.dry  | 2 | 86.92 2-18752604  | dry | YES | 2.00E-04 | 0.574318474  | 0.002367273   | 0.020073434 | 0.019481339 | 0  |
| AT2G41440 | WC.dry_2_87  | WC.dry  | 2 | 86.92 2-18752604  | dry | YES | 3.00E-04 | 0.5650256    | 0.003367241   | 0           | 0           | 0  |
| AT2G41620 | WC.dry_2_87  | WC.dry  | 2 | 86.92 2-18752604  | dry | YES | 3.00E-04 | 0.561852137  | 0.003367241   | 0.000773395 | 0           | 0  |
| AT2G31560 | WC.dry_2_87  | WC.dry  | 2 | 86.92 2-18752604  | dry | YES | 4.00E-04 | 0.552065936  | 0.00434       | 0.01642036  | 0.004950495 | 0  |
| AT2G46950 | WC.dry_2_87  | WC.dry  | 2 | 86.92 2-18752604  | dry | YES | 7.00E-04 | 0.544019642  | 0.006801493   | 0.000581734 | 0.001748252 | 0  |
| AT2G39800 | WC.dry_2_87  | WC.dry  | 2 | 86.92 2-18752604  | dry | YES | 8.00E-04 | 0.535503993  | 0.007547826   | 0.001006258 | 0.001511682 | 0  |
| AT2G30990 | WC.dry_2_87  | WC.dry  | 2 | 86.92 2-18752604  | dry | YES | 0.0012   | 0.47657037   | 0.009888608   | 0.000576092 | 0           | 0  |
| AT2G31440 | WC.dry_2_87  | WC.dry  | 2 | 86.92 2-18752604  | dry | YES | 0.0011   | 0.464856607  | 0.009548      | 0           | 0           | 0  |
| AT2G36870 | WC.dry_2_87  | WC.dry  | 2 | 86.92 2-18752604  | dry | YES | 0.0012   | 0.434137125  | 0.009888608   | 0           | 0           | 0  |
| AT2G40820 | WC.dry_2_87  | WC.dry  | 2 | 86.92 2-18752604  | dry | YES | 0.0024   | 0.411686186  | 0.017555056   | 0.000676133 | 0.00203252  | 0  |
| AT2G42170 | WC.dry_2_87  | WC.dry  | 2 | 86.92 2-18752604  | dry | YES | 0.0021   | 0.394719689  | 0.015535227   | 0.017171717 | 0.03343465  | 0  |
| AT2G39400 | WC.dry_2_87  | WC.dry  | 2 | 86.92 2-18752604  | dry | YES | 0.0038   | 0.375403271  | 0.02576875    | 0.009615385 | 0.003215434 | 0  |
| AT2G32880 | WC.dry_2_87  | WC.dry  | 2 | 86.92 2-18752604  | dry | YES | 0.0053   | 0.360040633  | 0.033826471   | 0.00522466  | 0.006289308 | 0  |
| AT2G32930 | WC.dry_2_87  | WC.dry  | 2 | 86.92 2-18752604  | dry | YES | 0.0055   | 0.359533821  | 0.034427885   | 0           | 0           | 0  |
| AT2G39110 | WC.dry_2_87  | WC.dry  | 2 | 86.92 2-18752604  | dry | YES | 0.0055   | 0.357195407  | 0.034427885   | 0.003058104 | 0.002298851 | 0  |
| AT2G37710 | WC.dry_2_87  | WC.dry  | 2 | 86.92 2-18752604  | dry | YES | 0.0085   | 0.314288685  | 0.045731405   | 0.024654832 | 0.017777778 | 0  |
| AT2G38000 | WC.dry_2_87  | WC.dry  | 2 | 86.92 2-18752604  | dry | YES | 0.009    | 0.301209057  | 0.04725       | 0.000793651 | 0.002386635 | 0  |
| AT2G36470 | WC.dry_2_87  | WC.dry  | 2 | 86.92 2-18752604  | dry | YES | 0.0119   | 0.299862952  | 0.058688636   | 0.00203252  | 0           | 0  |
| AT2G31490 | WC.dry_2_87  | WC.dry  | 2 | 86.92 2-18752604  | dry | YES | 0.0102   | 0.291869998  | 0.051474419   | 0.00462963  | 0           | 0  |
| AT2G39890 | WC.dry_2_87  | WC.dry  | 2 | 86.92 2-18752604  | dry | YES | 0.0095   | 0.287548833  | 0.049083333   | 0.005267118 | 0           | 0  |
| AT2G32140 | WC.dry_2_87  | WC.dry  | 2 | 86.92 2-18752604  | dry | YES | 0.0136   | 0.285731082  | 0.064156522   | 0.015065913 | 0.025495751 | 0  |
| AT2G41830 | WC.dry_2_87  | WC.dry  | 2 | 86.92 2-18752604  | dry | YES | 0.0146   | 0.270242274  | 0.066004167   | 0.001949318 | 0           | 0  |
| AT2G36460 | WC.dry_2_87  | WC.dry  | 2 | 86.92 2-18752604  | dry | YES | 0.0146   | 0.259707728  | 0.066004167   | 0.001550396 | 0.003269307 | 0  |
| AT2G40960 | WC.dry_2_87  | WC.dry  | 2 | 86.92 2-18752604  | dry | YES | 0.0167   | 0.248995812  | 0.07296443    | 0.002840999 | 0.005698006 | 0  |
| AT2G33370 | WC.dry_2_87  | WC.dry  | 2 | 86.92 2-18752604  | dry | YES | 0.0224   | 0.23311418   | 0.090014815   | 0           | 0           | 0  |
| AT2G33470 | WC.dry_2_87  | WC.dry  | 2 | 86.92 2-18752604  | dry | YES | 0.0221   | 0.227741208  | 0.08936087    | 0.006568144 | 0           | 0  |
| AT2G32040 | WC.dry_2_87  | WC.dry  | 2 | 86.92 2-18752604  | dry | YES | 0.0401   | 0.191078798  | 0.135964063   | 0.001188354 | 0           | 0  |
| AT2G40750 | WC.dry_2_87  | WC.dry  | 2 | 86.92 2-18752604  | dry | YES | 0.0941   | 0.11865877   | 0.261791026   | 0.00192123  | 0           | 0  |
| AT2G45960 | WC.dry_2_87  | WC.dry  | 2 | 86.92 2-18752604  | dry | YES | 0.0931   | 0.114405312  | 0.260120601   | 0.002318209 | 0           | 0  |
| AT2G31320 | WC.dry_2_87  | WC.dry  | 2 | 86.92 2-18752604  | dry | YES | 0.1161   | 0.099399413  | 0.307240244   | 0.00203252  | 0.002034588 | 0  |
| AT2G41410 | WC.dry_2_87  | WC.dry  | 2 | 86.92 2-18752604  | dry | YES | 0.1181   | 0.09825996   | 0.3108        | 0.004608295 | 0.00462963  | 0  |
| AT2G47210 | WC.dry_2_87  | WC.dry  | 2 | 86.92 2-18752604  | dry | YES | 0.2078   | 0.054990201  | 0.466475172   | 0           | 0           | 0  |
| AT2G44180 | WC.dry_2_87  | WC.dry  | 2 | 86.92 2-18752604  | dry | YES | 0.2625   | 0.037201976  | 0.548581529   | 0.001508296 | 0.004535147 | 0  |
| AT2G33150 | WC.dry_2_87  | WC.dry  | 2 | 86.92 2-18752604  | dry | YES | 0.2635   | 0.034669414  | 0.548581529   | 0           | 0           | 0  |
| AT2G40060 | WC.dry_2_87  | WC.dry  | 2 | 86.92 2-18752604  | dry | YES | 0.3122   | 0.025355777  | 0.60844209    | 0.027027027 | 0.011627907 | 0  |
| AT2G36305 | WC.dry_2_87  | WC.dry  | 2 | 86.92 2-18752604  | dry | YES | 0.3426   | 0.018646465  | 0.652138776   | 0.003205128 | 0.006430868 | 0  |
| AT2G34760 | WC.dry_2_87  | WC.dry  | 2 | 86.92 2-18752604  | dry | YES | 0.3529   | 0.016655071  | 0.66398237 NA | NA          | NA          | NA |
| AT2G44290 | WC.dry_2_87  | WC.dry  | 2 | 86.92 2-18752604  | dry | YES | 0.4804   | 0.001337139  | 0.830586207   | 0.01618123  | 0.024390244 | 0  |
| AT2G47140 | WC.dry_2_87  | WC.dry  | 2 | 86.92 2-18752604  | dry | YES | 0.6619   | -0.019356551 | 1             | 0.00129199  | 0.003891051 | 0  |
| AT2G45660 | WC.dry_2_87  | WC.dry  | 2 | 86.92 2-18752604  | dry | YES | 0.7266   | -0.031973185 | 1             | 0           | 0           | 0  |
| AT2G45340 | WC.dry_2_87  | WC.dry  | 2 | 86.92 2-18752604  | dry | YES | 0.8298   | -0.07284471  | 1             | 0.001926782 | 0.001447178 | 0  |
| AT2G38860 | WC.dry_2_87  | WC.dry  | 2 | 86.92 2-18752604  | dry | YES | 0.9363   | -0.160214149 | 1             | 0.001920399 | 0           | 0  |
| AT2G46450 | WC.dry_2_87  | WC.dry  | 2 | 86.92 2-18752604  | dry | YES | 0.9431   | -0.172020219 | 1             | 0.002051282 | 0.003081664 | 0  |
| AT2G43620 | WC.dry_2_87  | WC.dry  | 2 | 86.92 2-18752604  | dry | YES | 0.9951   | -0.453053182 | 1             | 0.005868545 | 0           | 0  |
| AT2G45510 | WC.dry_2_87  | WC.dry  | 2 | 86.92 2-18752604  | dry | YES | 0.9973   | -0.471591324 | 1             | 0.001302083 | 0.001956947 | 0  |
| AT2G43980 | WC.dry_2_87  | WC.dry  | 2 | 86.92 2-18752604  | dry | YES | 0.9994   | -0.657539829 | 1             | 0.000681663 | 0           | 0  |
| AT2G47400 | WC.dry_2_87  | WC.dry  | 2 | 86.92 2-18752604  | dry | YES | 0.9997   | -0.836164862 | 1             | 0.013333333 | 0.016129032 | 0  |
| AT2G38530 | WC.dry_2_87  | WC.dry  | 2 | 86.92 2-18752604  | dry | YES | 0.9998   | -0.923894493 | 1             | 0           | 0           | 0  |
| AT2G45910 | WC.dry_2_87  | WC.dry  | 2 | 86.92 2-18752604  | dry | YES | 1        | -1.036397392 | 1             | 0.000798403 | 0.001199041 | 0  |

Supplemental Data. Lovell et al. (2015). Plant Cell 10.1105/tpc.15.00122

**Supplemental Table 6.** List of cytoplasmic SNPs between TSU and KAS

| Position | COL | TSU | KAS | Gene       | Gene Start | Other names                        |
|----------|-----|-----|-----|------------|------------|------------------------------------|
| 4795     | G   | G   | T   | Intergenic |            |                                    |
| 7894     | A   | A   | T   | Intergenic |            |                                    |
| 16875    | C   | T   | C   | ATMG00050  | 16844      | ORF131                             |
| 18528    | C   | A   | C   | Intergenic |            |                                    |
| 24179    | G   | T   | G   | ATMG00070  | 23663      | NAD9, NADH DEHYDROGENASE SUBUNIT 9 |
| 38291    | C   | C   | T   | Intergenic |            |                                    |
| 136960   | C   | G   | C   | ATMG00510  | 132071     | NADH DEHYDROGENASE SUBUNIT 7       |
| 189636   | A   | A   | T   | Intergenic |            |                                    |
| 189637   | A   | A   | T   | Intergenic |            |                                    |
| 192055   | T   | T   | C   | Intergenic |            |                                    |
| 192056   | C   | C   | A   | Intergenic |            |                                    |
| 207568   | T   | G   | T   | ATMG00710  | 207553     | ORF120                             |
| 209160   | G   | G   | T   | Intergenic |            |                                    |
| 241974   | C   | C   | T   | Intergenic |            |                                    |
| 353877   | C   | A   | C   | Intergenic |            |                                    |
| 353878   | C   | A   | C   | Intergenic |            |                                    |

14 SUPPLEMENTAL MATERIALS

15       **Description of RILs and growth conditions.** The TSU-1 x KAS-1 mapping  
16 population was generated and distributed by John K. McKay. A seed library of this  
17 population is maintained at Colorado State University. These genotypes are made  
18 publically available through the Arabidopsis Stock Center. The association of RIL  
19 identifiers presented here, the R/qtl identification and the ARBC accession numbers can  
20 be found Supplementary Table 8.

21

22 SUPPLEMENTAL METHODS

23       **Quantitative Genetic Model.** We calculated RIL-specific breeding values as the  
24 least square mean from a mixed effect model with genotype as a fixed effect and growth  
25 chamber as the random term. We calculated the simplest form of phenotypic plasticity-  
26 the scale and center standardized difference in breeding values across experimental  
27 conditions. This was implemented in R by quantile normalizing the wet and dry breeding  
28 values, then taking the difference for each RIL. This was repeated for each phenotype.

29

30       **QTL Model Selection.** Breeding values for each RIL were generated as above-  
31 these served as the RIL means used in QTL mapping. QTL mapping as implemented  
32 here, due to the use of permutation test, is relatively robust to the distribution of the data.  
33 However, to be conservative, we mapped QTL for both raw breeding values and quantile-  
34 normalized values across the RIL population for each trait. The final models never  
35 differed in the number, interaction type, or chromosome of the QTLs for any trait. The  
36 QTL position moved slightly among models. Thus, the effect of normalization was very  
37 subtle and did not impact the final models. As such, we opted to conduct QTL mapping  
38 on the un-normalized phenotypes.

39       Prior to QTL mapping, we calculated genotype probabilities of any missing data  
40 at each marker. Furthermore, we conducted identical calculations for a set of  
41 pseudomarkers, placing these at intervals of 1cM within any gap >1cM. Pseudomarker  
42 and missing data genotype probabilities were calculated using the Kosambi map function,  
43 with an error probability of 0.01.

44           We generated QTL peak thresholds using permutations on the map with  
45           calculated genotype probabilities via the Haley-Knott regression (Haley and Knott, 1992;  
46           Broman 2003), assuming a normal phenotype distribution. The phenotype-covariate  
47           structure was maintained and permuted relative to a fixed genotype matrix 10,000 times  
48           for each phenotype. At each iteration, a two-way QTL scan was performed, and the peak  
49           LOD score for a set of six model comparisons was output. The distribution of these  
50           10,000 tests provided the significance threshold and P-values for each QTL and epistatic  
51           interaction. Permutations were also performed without a covariate where the entire  
52           phenotype matrix was sampled without replacement. From these distributions we  
53           calculated three penalties, which were used to penalize the addition of a single QTL,  
54           additional QTLs and epistatic interactions in the model selection protocol (Manichaikul  
55           et al. 2009).

56           We ran stepwise QTL model selection using two separate models, one with  
57           cytoplasm as a covariate, and another without this term. Penalties were assigned based on  
58           the model type and phenotype. Stepwise model selection was implemented in R/qtl using  
59           a NULL starting model and screening for models with up to 12 QTL and an unlimited  
60           number of epistatic interactions. At each step in the selection procedure, both interactive  
61           and additive QTL were screened and the term that best improves the total penalized LOD  
62           score of the model was retained. Additionally, at each step the position of each QTL was  
63           refined to screen for improvements in model fit. The full, 12-QTL model was then  
64           trimmed, one term at a time, and the whole-model penalized LOD score was recalculated.  
65           The model with the highest penalized LOD score following this forwards-backwards  
66           stepwise model selection was chosen. Finally, the two models, one with and the other  
67           without a cytoplasm covariate were compared and the model with the highest penalized  
68           LOD score was retained and fixed as the QTL model for that trait for all future analyses.

69           We calculated several statistics from each QTL model. First, we calculated the  
70           1.5LOD drop confidence interval (Broman and Sen 2009) for the LOD profiles, which  
71           resulted from the iterative scanning of positional effects used to refine QTL positions.  
72           Second, we fit an ANOVA to the model and calculated several statistics. The whole-  
73           model LOD, %variance, F-statistic and P-value were calculated from the full ANOVA fit  
74           to the model. QTL-specific effects were calculated by comparing nested model fits,

75 where the LOD, % variance, F-statistic and P-value were derived from a test of models  
 76 with and without the focal QTL term. Finally, estimated effects were generated by fitting  
 77 t-tests to the genotype probabilities at each QTL.

78

79 **Candidate Gene Methodology.** QTL models and formulae were generated  
 80 through automated stepwise model selection (described above). To isolate the effects of a  
 81 specific QTL in a multiple QTL model, we fit a one-way QTL scan with all model terms,  
 82 but the focal QTL, as covariates.

83 Take the simplest case, where a 1-QTL model without any experimental  
 84 covariates provides the best model fit. For a single trait QTL scan for trait  $i$ , we obtained  
 85 a LOD score by comparing the NULL model (without a QTL term, *model 1*) to a 1-QTL  
 86 model (*model 2*) (Broman and Sen 2009) with a single QTL,  $g$ .

87

88 *model 1: NULL*  $y_i = \mu + \varepsilon_i$

89 *model 2: 1-QTL*  $y_i = \mu + \beta_g g_i + \varepsilon_i$

90

91 Following the framework of Li et al. (2006), who utilized structural equation modeling to  
 92 define interactions among multiple phenotypic trait QTLs, we determined the  
 93 significance of gene expression covariate as cases where using trait  $x$  as a covariate  
 94 significantly reduces the LOD score of a QTL for trait  $i$ . In this case,  $x$  was associated  
 95 with variance in trait  $i$  and may invoke causality. This test was accomplished by  
 96 comparing the LOD score of a 1-QTL model (*model 2*) to a more complex model. In this  
 97 case, we obtained the LOD score by comparing *model 1* with the fit of a model with trait  
 98  $x$  as a covariate (Broman and Sen 2009)

99

100 *model 3: 1 QTL, 1 Covariate*  $y_i = \mu + \beta_x x_i + \beta_g g_i + \varepsilon_i$ .

101

102 LOD scores for the QTL term for each model were extracted and compared. The effect of  
 103 the difference in QTL-specific LOD scores was taken as

104

105  $covariate\ effect = (LOD_{model\ 2\ vs.\ model\ 1} - LOD_{model\ 3\ vs.\ model\ 1}) / LOD_{model\ 2\ vs.\ model\ 1}$ .

106

107 Across all models, the position of QTL  $g$  was fixed as the QTL position best supported in  
108 our multiple QTL modeling procedure.

109

110 The effects of random covariates were normally distributed around the LOD score for a  
111 1-QTL model without covariates (Fig. S1, black lines). Positive effects were the result of  
112 values that were un-correlated or orthogonal to the phenotypic trait values such that  
113 residual variance in the model was absorbed by the covariate term, improving the effect  
114 of the QTL term and thus the LOD score (Fig. S1, blue line). However, gene expression  
115 values that were correlated with genotypes at the QTL, absorbed variance otherwise  
116 attributed to the QTL, reducing the LOD score (Fig. S1, red line). As such, we expected  
117 genes with expression polymorphism that drove phenotypic trait variation attributable to  
118 the focal phenotype to be correlated, causing a decrease in LOD at the focal QTL.

119 Here, we implemented this approach for each candidate gene within the interval  
120 surrounding the QTL. To determine significance, we sampled without replacement  
121 (permuted) the gene expression vector 10,000 times. This generated a distribution around  
122 the original QTL model that permitted a test for the significance of the observed effect  
123 for each gene expression covariate. In the example presented in Figure S1, this would be  
124 performed by comparing the red, correlated line to the distribution of black dotted lines  
125 derived from permutations of the covariate data. Since we expected gene expression  
126 variation to be responsible for QTL-specific trait variation when correlated with the  
127 phenotypic trait values, and not the residuals, we defined candidate genes only as those  
128 which, when incorporated as a covariate, significantly reduced the LOD score at a focal  
129 QTL.

130 This approach is akin to partial correlation testing, in the framework of QTL  
131 modeling. Furthermore, the original model, here the grey “no.covar” line, can be as  
132 complex as the researcher chooses. To choose the least complex model that explains the  
133 most variation, we implemented a penalized stepwise model search as described above.  
134 Instead of rebuilding the model separately for each gene-expression covariate, we took  
135 this selected model and added, then removed the covariate and examined the LOD effect



136 of this term. This procedure, and 10,000 permutations, was repeated for the gene  
137 expression phenotypes of each candidate gene underneath each QTL.

138         It is important to note that our experimental design utilized gene expression on a  
139 104 line subset of those RILs with phenotypic trait and genotype data. Since the  
140 accompanying reduction in power limits our ability to detect QTL, we utilized the  
141 original QTL models, but fit the covariates with the 104 line complete dataset. This  
142 permitted comparisons among models without the discrepancies caused by differential  
143 power among datasets.
